1  
2  
3  
4  
5  
6  
7  
8  
9  
10  
11  
12  
13  
14  
15  
16  
17

**Saliva sampling is an excellent option to increase the number of SARS CoV2  
diagnostic tests in settings with supply shortages**

Joaquín Moreno-Contreras<sup>1</sup>, Marco A. Espinoza<sup>1</sup>, Carlos Sandoval-Jaime<sup>1</sup>, Marco A. Cantú-  
Cuevas<sup>2</sup>, Héctor Barón-Olivares<sup>3</sup>, Oscar D. Ortiz-Orozco<sup>3</sup>, Asunción V. Muñoz-Rangel<sup>3</sup>, Manuel  
Hernández-de la Cruz<sup>3</sup>, César M. Eroza-Osorio<sup>3</sup>, Carlos F. Arias<sup>1</sup>, Susana López<sup>1\*</sup>

<sup>1</sup>Departamento de Genética del Desarrollo y Fisiología Molecular, Instituto de Biotecnología  
UNAM, Av. Universidad 2001, Col. Chamilpa, Cuernavaca, Morelos; <sup>2</sup>Secretaría de Salud del Edo.  
de Morelos, Ajusco #2 Col. Buena Vista, Cuernavaca, Morelos; <sup>3</sup>Servicios de Salud del Edo. de  
Morelos. Callejón Borda 3 Col. Centro, Cuernavaca, Morelos.

\*Corresponding author e-mail [susana@ibt.unam.mx](mailto:susana@ibt.unam.mx)

Running title: A simpler and faster method to diagnose SARS CoV-2

## 18 **Abstract**

19           As part of any plan to lift or ease the confinement restrictions that are in place in many  
20 different countries, there is an urgent need to increase the capacity of laboratory testing for SARS  
21 CoV-2. Detection of the viral genome through RT-qPCR is the golden standard for this test,  
22 however, the high demand of the materials and reagents needed to sample individuals, purify  
23 the viral RNA, and perform the RT-qPCR test has resulted in a worldwide shortage of several of  
24 these supplies. Here, we show that directly lysed saliva samples can serve as a suitable source for  
25 viral RNA detection that is cheaper and can be as efficient as the classical protocol that involves  
26 column purification of the viral RNA. In addition, it surpasses the need for swab sampling,  
27 decreases the risk of the healthcare personnel involved in this process, and accelerates the  
28 diagnostic procedure.

29

## 30 **INTRODUCTION**

31           With the worldwide COVID-19 health emergency, there is an urgent need for rapid and  
32 reliable methods of diagnostic for SARS-CoV-2. The accepted golden standard for detection of  
33 this virus is the amplification of regions of the viral genome by RT-qPCR in nasopharyngeal and  
34 oropharyngeal swabs [1][2]. Unfortunately, given the enormous demand of the reagents needed  
35 to collect the biological samples, and to purify the viral RNA, there have been shortages of many  
36 of the reagents needed for the diagnostic tests. Swabs, viral transport media, and kits for viral  
37 RNA extraction are amongst the most common consumables that have become scarce,  
38 compromising the number of tests that can be done in many parts of the world.

39           Recently, several reports have demonstrated the possibility of using saliva instead of oral  
40 and nasal swabs to detect the genome of SARS-COV-2 [3][4][5]. Saliva collection also has many  
41 collateral benefits, including self-collection, what decreases the risk of healthcare workers in  
42 charge of taking the swabs, and does not require the use of PPE (personal protecting equipment)  
43 that has also become a scarce item in this pandemia [6][7]. In addition, the methods to extract  
44 the RNA from biological samples require the use of purification kits whose availability has also  
45 become limited due to the heavy worldwide demand.

46           In this report, we compared the RT-qPCR results from 253 paired samples obtained from  
47 saliva and swabs of ambulatory patients; the RNA in the swab samples was extracted using a  
48 commercial RNA purification kit, and the saliva samples were directly mixed with a lysis buffer,  
49 boiled, and used for the RT-qPCR protocol. We found a very good correlation of results between  
50 both types of samples, and propose that this method, which simplifies the sampling of patients,  
51 and accelerates the preparation of the RNA for the RT-qPCR test represents an excellent  
52 alternative that will facilitate to sample and diagnose a larger number of persons at a reduced  
53 cost.

54

## 55 **MATERIALS AND METHODS**

56 **Sample collection.** 253 paired samples from oropharyngeal and/or nasopharyngeal swabs, and  
57 saliva were collected during a span of 30 days (from May 2<sup>nd</sup> to 31<sup>st</sup>) by healthcare workers from  
58 the epidemiology department of the health ministry of the state of Morelos (Secretaría de Salud  
59 Morelos, SSM). All but 3 samples, were from ambulatory patients, the 3 exceptions were  
60 collected from hospitalized patients.

61 **Swab sampling.** Oropharyngeal and nasopharyngeal swabs were taken from 71 patients, while a  
62 single oropharyngeal swab was taken from 182 patients. After their collection, swabs were placed  
63 in 2.5 ml of viral transport medium.

64 **Saliva Collection.** Saliva was self-collected by patients that were asked to spit on several  
65 occasions into sterile urine cup containers until completing roughly 2-3 ml of saliva. No viral  
66 transport media, nor stabilizing agents, were added to the saliva samples.

67 After collection, both swab and saliva samples were stored and kept at 4°C until  
68 transported to the Institute of Biotechnology/UNAM for their analysis, which was within 24 -36  
69 hours after sample collection.

70

71 **Nucleic acid extraction and SARS-CoV-2 detection by RT-qPCR.** Total RNA was extracted from  
72 swab samples using the QIAamp viral RNA mini kit (QIAGEN) following the manufacturer's  
73 protocol, using 140 µl of viral transport medium from each swab, and the purified RNA was eluted  
74 in 60 µl of elution buffer.

75 Saliva samples were treated with the Quick Extract™ DNA Extraction Solution (QE,  
76 Lucigen) by mixing 50 µl of saliva with 50 µl of the QE reagent and heating for 5 minutes at 95°C,  
77 the mixture was then cooled on ice and kept at 4°C until their use (within 1 hour of QE treatment).  
78 In saliva samples that had high viscosity, 1 volume of sterile phosphate-buffered saline (PBS) was  
79 added and mixed by repeated pipetting, and the diluted saliva sample was the extracted as  
80 mentioned above.

81 SARS-CoV-2 detection was performed using the Berlin protocol, using the reported oligos  
82 and probes for viral gene E and for human RNase P [19]. The RT-qPCR reactions were performed

83 using the StarQ One-Step RT-qPCR (Genes 2 Life) kit, using 5  $\mu$ l of the column extracted total RNA  
84 in a 20  $\mu$ l of reaction mix, or 2.5  $\mu$ l of the QE treated saliva into 22.5  $\mu$ l of reaction mix. Samples  
85 were analyzed in an ABI Prism 7500 Sequence Detector System (Applied Biosystems) with the  
86 following thermal protocol: 50°C for 15 min, 95°C for 2 min and then 45 cycles of 95°C for 15 s  
87 and 60°C for 30 s. All samples with a Ct value equal or less than 38 were classified as positive.

88 **Determination of viral copy number.** To determine the viral copy number in a sample, a standard  
89 curve was generated using a 10-fold serial dilution of an *in vitro* T7 RNA transcript that encodes  
90 the sequence recognized by oligonucleotides and probe for gene E. Briefly, the logarithm of  
91 concentration of each dilution was plotted against the Ct and the viral copy number from  
92 unknown samples was determined by extrapolating the Ct value onto the corresponding  
93 standard curve.

94 **Statistical analysis.** Statistical analysis was performed using GraphPad Prism 6.0 (GraphPad  
95 Software Inc.) as described in the results section.

96

## 97 **RESULTS**

98 **Detection of SARS-CoV-2 in paired swab and saliva samples.** To evaluate if saliva is a good source  
99 of viral RNA for the RT-qPCR tests we determined the presence of the SARS-CoV-2 genome in  
100 paired saliva and swab samples from 253 ambulatory patients. All patients had two or more  
101 symptoms related to COVID-19 [8][9], 115 (45.4%) were male and 137 (54.1%) female, with a  
102 median age of 41 (+/-14.4) years. Samples were taken from ambulatory patients in the  
103 respiratory triage of the Tlaltenango health center, in Cuernavaca, Morelos. The RT-qPCR Berlin

104 protocol was used to detect SARS-CoV-2, using only the primers and probe for gene E, since  
105 previous studies have shown a weak detection of viral RNA when the RdRp gene is probed  
106 [10][11]. As an internal control of RNA content in the samples, the RNase P gene was detected.  
107 Total RNA was purified from swabs using the QIAamp viral RNA mini kit; the RNA in saliva was  
108 directly obtained using the QE lysis buffer (Lucigen) and boiling for 5 min, as reported [12].

109         During the course of the study, and due to the shortage of swabs, the health center  
110 shifted temporarily from collecting two swabs per person (nasopharyngeal swab -NPS- plus  
111 oropharyngeal swab -OPS) to only one swab (OPS) per individual. From the 253 patients included  
112 in this study, two swabs were used in 71 (28%) of the cases, while a single OPS was taken from  
113 the other 182 (72%); irrespectively of the number of swabs collected, saliva samples were taken  
114 from all patients.

115         Of the 182 patients with a single swab collected, 80 (43.9%) were positive for SARS CoV2  
116 either in the swab or saliva samples. Of these, 41 (51.2%) were positive in both types of samples,  
117 while 28 (35%) were only detected in saliva and not in the swab sample, and 11 (13.7%) were  
118 only positive in the OPS. In total, out of the 80 individuals found to be positive for the virus, 69  
119 (86.2%) were correctly detected using saliva, while only 52 (65%) were detected with the OPS.  
120 (Table 1, Fig. 1).

121         On the other hand, 34 (47.8%) of the 71 patients with two swabs collected were found  
122 positive for SARS-CoV-2 in either the swabs or the saliva samples. Of these, 19 (55.8%) were  
123 positive both in swabs and saliva, while 6 (17.6%) were only positive in saliva, and 9 (26.4%) were  
124 only positive in the two-swab sample. In total, in this group of patients, of the 34 individuals

125 detected as positive for the virus, 25 (73.5%) were identified by testing saliva, while 28 (82.3%)  
126 were positive by testing the swabs (Table 1 and Fig. 1).

127

128 **Quantitation of viral RNA.** When the number of viral genome copies in the single OPS and saliva  
129 samples were compared, a significant difference in the geometric mean was detected, with saliva  
130 samples having a 1.9 log<sub>10</sub> higher titer than that observed in the swabs (p<0.0024, Fig. 2A). This  
131 can be better appreciated when the viral copy number in paired swabs and saliva from the same  
132 patient, is plotted and represented as connecting lines (Fig. 2B); in 31 of the paired samples the  
133 number of viral copies was higher in saliva samples than in swabs. Human RNase P was used as  
134 an internal control of sampling quality; of interest, the comparison between the mean of Ct  
135 values obtained from OPS and saliva samples showed a difference of at least 6.8 Ct's between  
136 both types of samples (Fig. 2C), indicating that there is more cellular material in saliva, as  
137 reported in other studies[13]. The viral genome copy number in the double-swab and saliva  
138 samples was not statistically different, although a larger set of data would be needed to confirm  
139 these results (data not shown).

140 Taken together, these results suggest that that saliva is a good source for SARS-CoV-2  
141 detection, especially when compared with a single OPS. Furthermore, it can be implemented for  
142 diagnostic tests using a simple QE buffer-based sample preparation in place of the column-based  
143 RNA purification method that is currently employed for swab analyses.

144

145

146

147 **DISCUSSION**

148           In this study we analyzed 253 paired samples from OPS, or OPS and NPS and saliva. RNA  
149 purified from swabs using commercial column kits was compared with saliva samples directly  
150 lysed with QE buffer (surpassing the RNA extraction protocol), as source for the RT-qPCR assay.  
151 Although the coincidence rate between the single OPS and saliva samples was relatively low  
152 (51.2%), the saliva samples were clearly more efficient in detecting the virus when compared to  
153 single OPS samples (86.2% vs 65%). On the other hand, the efficiency of detection of the virus in  
154 saliva when compared to the double OPS and NPS was slightly lower (73.5% vs 82.3%), with a  
155 coincidence rate of 55.8%.

156           The reason for the low coincidence in the positive results obtained with swab and saliva  
157 samples is not clear. The failure of identification of SARS-CoV-2 in swabs, when the saliva samples  
158 were positive for the virus, could be due to bad swab sampling, what can be corroborated by the  
159 higher Ct values of RNase P detected in these samples (Fig. 2C), with the consequent low viral  
160 copy number. This is a major concern, since the medical personnel in charge of taking the samples  
161 frequently do not do it correctly for the risk associated with this process. It has been reported  
162 that oropharyngeal swabs have a lower viral titer compared with nasopharyngeal swabs [2]; thus,  
163 this could contribute to the discrepancies observed. Furthermore, it has also been previously  
164 reported that nasopharyngeal swabs have a lower viral titer than saliva samples [13], what can  
165 also contribute to explain our findings. On the other hand, the false negatives in saliva could be  
166 due to undetected problems during the collection, transport and or storage of the sample before  
167 its arrival to the laboratory.



168 SARS-CoV-2 has been detected in saliva at higher titers during the first days after the  
169 onset of symptoms, with the viral titer declining over time. It is not clear how long after the  
170 symptom onset the viral RNA can be detected in saliva, although some reports suggest a short  
171 period of detection (~13 days) as compared with nasopharyngeal swabs (~19 days) [14].  
172 However, other reports have recently demonstrated the detection of viral RNA in saliva for longer  
173 periods of time (~20 days or longer) [3][15]. The patients included in this study were ambulatory,  
174 and according to their clinical interview had between 1 and 7 days (median of 4 days) of the onset  
175 of symptoms. We did not find a significant difference between the onset of symptoms and the  
176 results obtained from samples that were only positive in saliva versus those that were only  
177 detected in swabs.

178 Direct lysis of nasopharyngeal or oropharyngeal swab samples in viral transport medium  
179 using the QE buffer has been reported as a suitable method for direct RT-qPCR for SARS-COV-2  
180 detection, with rates similar to methods based on column purification [16][12]. However, in our  
181 experience we have found a great variability in the results obtained using the QE lysis protocol  
182 when applied to swab samples, most likely due to variations in the material of the swabs used  
183 and to variations in the preparation of the viral transport medium employed (data not shown).  
184 In this regard, it has recently been reported that the composition of viral transport media can  
185 affect the detection of viral RNA from SARS-CoV-2 and other viruses [17] and, due to the scarcity  
186 of it, several laboratories have started to prepare their own transport media introducing an  
187 additional confusion factor. A similar situation occurs with the swabs, since in view of the scarce  
188 suitable materials, other materials are being employed, despite the fact that some of them are  
189 known to inhibit the RT-PCR reactions [18].

190           The use of saliva samples offers the advantage that no additives or transport media need  
191 to be used for their preservation or analysis if stored in cold and analyzed up to 36 h after their  
192 collection. Our results indicate that a rapid processing of saliva using direct lysis with QE buffer  
193 offers an excellent alternative to the current swab analysis that uses RNA column purification,  
194 since it is a sensitive, fast and cheap method that can be used for massive screening, in particular  
195 in those settings where common supplies needed for the classical methods are in shortage.

196

## 197 **ACKNOWLEDGMENTS**

198 We are grateful to the healthcare workers of Servicios Estatales de Salud de Morelos for their  
199 invaluable help in collecting the samples, and to the personnel of the Laboratorio Estatal de Salud  
200 Pública del Estado de Morelos, for their support in the preparation and transporting of the  
201 samples. Part of the reagents used in this study were provided by the Instituto Nacional de  
202 Diagnóstico y Referencia Epidemiológica supported by INSABI. This work was supported by grant  
203 314343 from CONACyT.

204

## 205 **FIGURE LEGENDS**

206 **Figure 1. Detection of SARS-CoV-2 in paired swab and saliva samples.** Percent number of  
207 positive samples detected in single OPS and saliva, or double (OPS + NPS) and saliva, as indicated.

208 Data are extracted from Table 1.

209

210 **Figure 2. A high SARS-CoV-2 genome copy number is detected in saliva samples.** A) Viral titer  
211 (viral copies/ml) detected in paired OPS and saliva samples B) Viral titer detected in paired OPS

212 and saliva samples were represented by lines connecting both samples. Data were compared by  
213 a Wilcoxon test ( $p < 0.0024$ ); C) RT-PCR cycle threshold Ct values for RNase P detected in OPS and  
214 saliva samples. Data were compared by Wilcoxon test ( $p < 0.0001$ ). Bars represent the geometric  
215 median and 95% CI.  
216

217 **REFERENCES**

218

- 219 [1] Wang Y, Kang H, Liu X, Tong Z. Combination of RT-qPCR testing and clinical features  
220 for diagnosis of COVID-19 facilitates management of SARS-CoV-2 outbreak. *J Med*  
221 *Virol.* 2020;92(6):538-539. doi:10.1002/jmv.25721.
- 222 [2] Pan Y, Zhang D, Yang P, Poon LLM, Wang Q. Viral load of SARS-CoV-2 in clinical  
223 samples. *Lancet Infect Dis.* 2020;20(4):411-412. doi:10.1016/S1473-3099(20)30113-4.
- 224 [3] To KK, Tsang OT, Chik-Yan Yip C, et al. Consistent detection of 2019 novel coronavirus  
225 in saliva. *Clin Infect Dis.* 2020;ciaa149. doi:10.1093/cid/ciaa149.
- 226 [4] Williams E, Bond K, Zhang B, Putland M, Williamson DA. Saliva as a non-invasive  
227 specimen for detection of SARS-CoV-2. *J Clin Microbiol.* 2020;JCM.00776-20.  
228 doi:10.1128/JCM.00776-20.
- 229 [5] Kojima N, Turner F, Slepnev V, et al. Self-Collected oral fluid and nasal swabs demonstrate  
230 comparable sensitivity to clinician collected nasopharyngeal swabs for Covid-19 detection.  
231 medRxiv 2020.04.11.20062372; doi: <https://doi.org/10.1101>.
- 232 [6] Ng K, Poon BH, Kiat Puar TH, et al. COVID-19 and the Risk to Health Care Workers: A  
233 Case Report. *Ann Intern Med.* 2020;172(11):766-767. doi:10.7326/L20-0175.
- 234 [7] Khurshid Z, Asiri FYI, Al Wadaani H. Human Saliva: Non-Invasive Fluid for Detecting  
235 Novel Coronavirus (2019-nCoV). *Int J Environ Res Public Health.* 2020;17(7):2225. Published  
236 2020 Mar 26. doi:10.3390/ijerph17072225.
- 237 [8] Huang C, Wang Y, Li X, et al. Clinical features of patients infected with 2019 novel  
238 coronavirus in Wuhan, China. *Lancet.* 2020;395(10223):497-506. doi:10.1016/S0140-  
239 6736(20)30183-5.
- 240 [9] Wang D, Hu B, Hu C, et al. Clinical Characteristics of 138 Hospitalized Patients With  
241 2019 Novel Coronavirus-Infected Pneumonia in Wuhan, China.  
242 *JAMA.*2020;323(11):1061-1069. doi:10.1001/jama.2020.1585.
- 243 [10] Nalla AK, Casto AM, Huang MW, et al. Comparative Performance of SARS-CoV-2  
244 Detection Assays Using Seven Different Primer-Probe Sets and One Assay Kit. *J Clin*  
245 *Microbiol.* 2020;58(6):e00557-20. doi:10.1128/JCM.00557-20.
- 246 [11] Ramírez JD, Muñoz M, Hernández C, et al. Genetic diversity among SARS-CoV2 strains in  
247 South America may impact performance of Molecular detection. medRxiv  
248 2020.06.18.20134759; doi: 10.1101/2020.06.18.20134759.
- 249 [12] Ladha A, Joung J, Abudayyeh OO, et al. A 5-min RNA preparation method for COVID-19  
250 detection with RT-qPCR. medRxiv 2020.05.07.20055947; doi:  
251 10.1101/2020.05.07.20055947.
- 252 [13] Wyllie AL, Fournier J, Casanovas-Massana A, et al. Saliva is more sensitive for SARS-CoV-2  
253 detection in COVID-19 patients than nasopharyngeal swabs. MedRxiv  
254 2020.04.16.20067835; doi:10.1101/2020.04.16.20067835.
- 255 [14] Iwasaki S, Fujisawa S, Nakakubo S, et al. Comparison of SARS-CoV-2 detection in  
256 nasopharyngeal swab and saliva. *J Infect.* 2020;S0163-4453(20)30349-2.  
257 doi:10.1016/j.jinf.2020.05.071.
- 258 [15] To KK, Tsang OT, Leung WS, et al. Temporal profiles of viral load in posterior  
259 oropharyngeal saliva samples and serum antibody responses during infection by SARS-  
260 CoV-2: an observational cohort study. *Lancet Infect Dis.* 2020;20(5):565-574.  
261 doi:10.1016/S1473-3099(20)30196-1.

- 262 [16] Sentmanat M, Kouranova E, Cui X. One-step RNA extraction for RT-qPCR detection of  
263 2019-nCoV. bioRxiv 2020.04.02.022384; doi:10.1101/2020.04.02.022384.
- 264 [17] Kirkland PD, Frost MJ. The impact of viral transport media on PCR assay results for the  
265 detection of nucleic acid from SARS-CoV-2 and other viruses. bioRxiv 2020.06.09.142323;  
266 doi:10.1101/2020.06.09.142323.
- 267 [18] Hedman J, Rådström P. Overcoming inhibition in real-time diagnostic PCR. *Methods Mol*  
268 *Biol.* 2013;943:17-48. doi:10.1007/978-1-60327-353-4\_2.
- 269 [19] V. M. Corman *et al.*, "Detection of 2019 -nCoV by RT-PCR," *Euro Surveill*, vol. 25, no. 3,  
270 pp. 1–8, 2020.
- 271
- 272
- 273
- 274

275  
276  
277  
278  
279

**Table 1. Summary of results obtained from parallel testing of swab and saliva samples from patients suspected of COVID-19**

|               |          | <b>Single swab (OPS)</b> |          |       |
|---------------|----------|--------------------------|----------|-------|
|               |          | Positive                 | Negative | Total |
| <b>Saliva</b> | Positive | 41                       | 28       | 69    |
|               | Negative | 11                       | 102      | 113   |
|               | Total    | 52                       | 130      | 182   |

280

|               |          | <b>Double swab (OPS+NPS)</b> |          |       |
|---------------|----------|------------------------------|----------|-------|
|               |          | Positive                     | Negative | Total |
| <b>Saliva</b> | Positive | 19                           | 6        | 25    |
|               | Negative | 9                            | 37       | 46    |
|               | Total    | 28                           | 43       | 71    |

281  
282  
283

284  
285  
286  
287  
288  
289

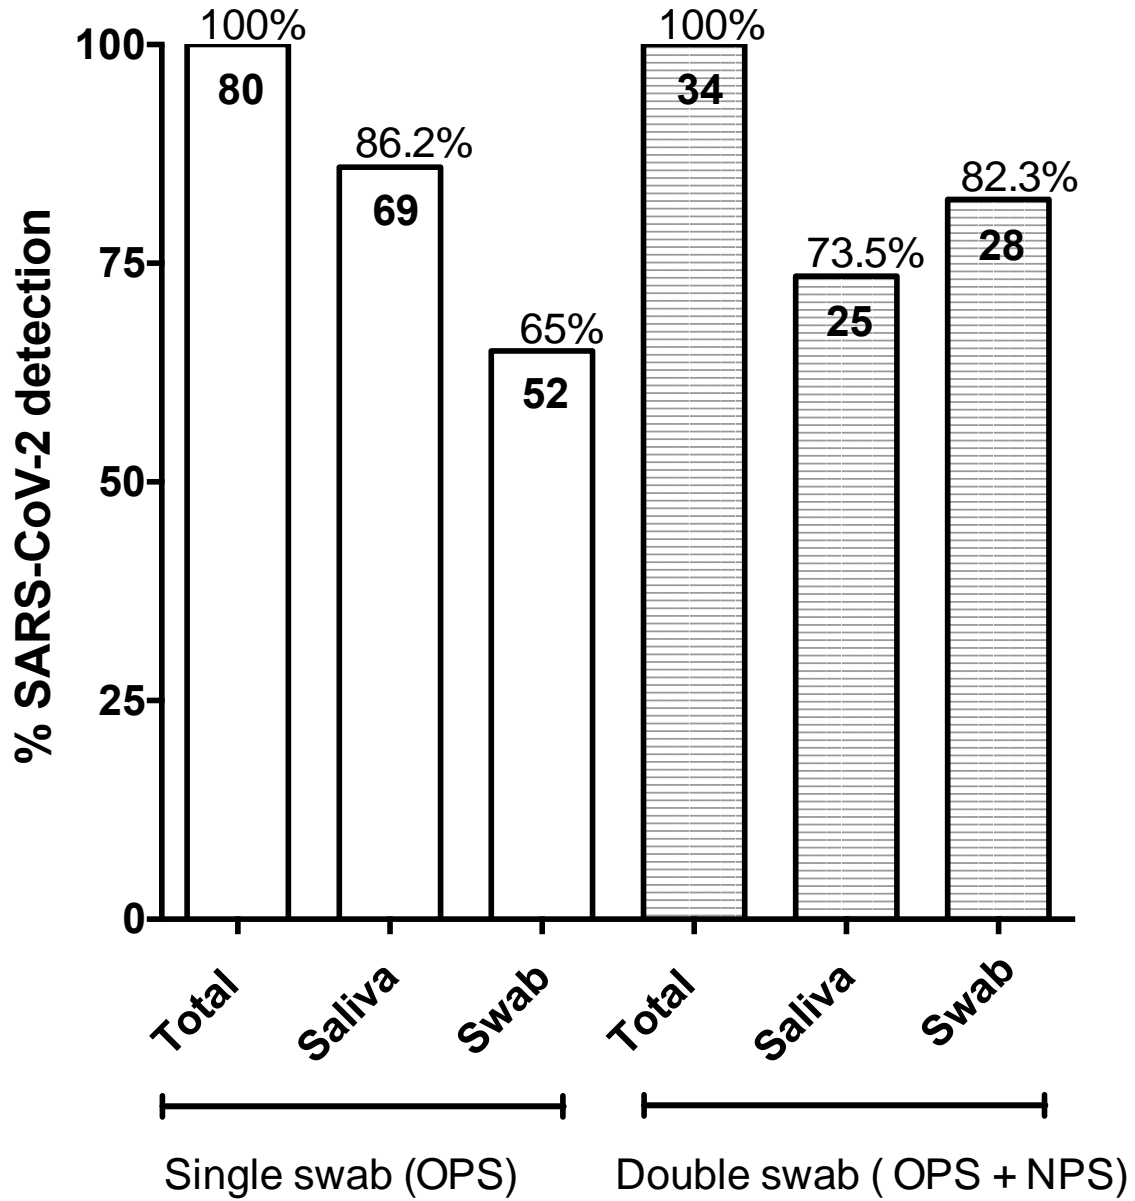

290  
291  
292  
293

Figure 1

294  
295  
296  
297  
298  
299  
300  
301  
302  
303  
304  
305  
306  
307  
308  
309  
310  
311  
312  
313  
314  
315  
316  
317  
318  
319  
320  
321  
322  
323  
324  
325  
326  
327  
328  
329  
330  
331  
332  
333  
334  
335

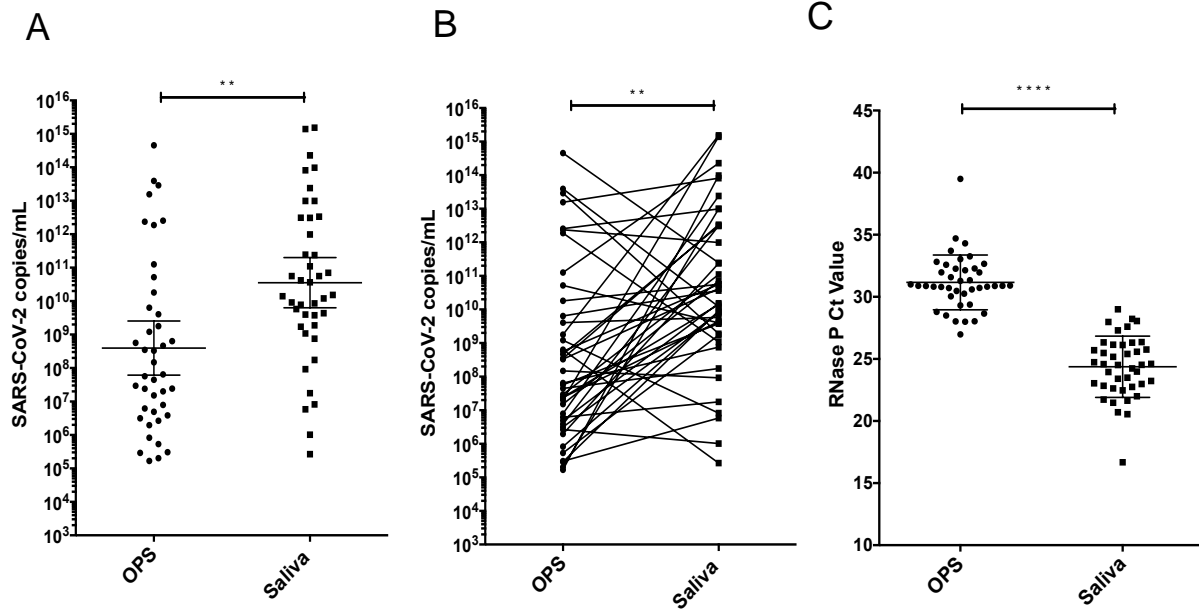

Figure 2
